# Supplementary material for: Associating Air Pollution with Cytokinesis-Block Micronucleus Assay Parameters in Lymphocytes of the General Population in Zagreb (Croatia)
Source: MDPI journal article supplement (doi:10.3390/ijms231710083), 2022-09-03
Supplement: s1 [file s1]

## Supplementary material

### **Associating Air Pollution with Cytokinesis-Block Micronucleus Assay Parameters in Lymphocytes of the General Population in Zagreb (Croatia)**

Goran Gajski<sup>1\*</sup>, Marko Gerić<sup>1</sup>, Gordana Pehnek<sup>2</sup>, Katarina Matković<sup>1</sup>, Jasmina Rinkovec<sup>2</sup>,  
Ivana Jakovljević<sup>2</sup>, Ranka Godec<sup>2</sup>, Silva Žužul<sup>2</sup>, Ivan Bešlić<sup>2</sup>, Ante Cvitković<sup>3,4,5</sup>,  
Pascal Wild<sup>6,7</sup>, Irina Guseva Canu<sup>6</sup>, Nancy B. Hopf<sup>6</sup>

<sup>1</sup>*Mutagenesis Unit, Institute for Medical Research and Occupational Health, Zagreb, Croatia*

<sup>2</sup>*Environmental Hygiene Unit, Institute for Medical Research and Occupational Health, Zagreb, Croatia*

<sup>3</sup>*Teaching Institute of Public Health Brod-Posavina County, Slavonski Brod, Croatia*

<sup>4</sup>*Faculty of Dental Medicine and Health, J. J. Strossmayer University of Osijek, Osijek, Croatia*

<sup>5</sup>*Faculty of Medicine, J. J. Strossmayer University of Osijek, Osijek, Croatia*

<sup>6</sup>*Center for Primary Care and Public Health (Unisanté), University of Lausanne, Lausanne, Switzerland*

<sup>7</sup>*PW Statistical Consulting, Laxou, France*

**\*Address correspondence to:** Goran Gajski, Institute for Medical Research and Occupational Health,  
Mutagenesis Unit, Ksaverska cesta 2, 10000 Zagreb, Croatia; e-mail address: ggajski@imi.hr

**Table S1.** Model selected for the frequency of micronuclei (MNI), nucleoplasmic bridges (NPBs), nuclear buds (NBUDs) and nuclear division index (NDI) with the confounders and the first factor (PM) for 3, 7, and 30 days.

|                          | 1        | 3 days          |         | 7 days          |         | 30 days         |         |
|--------------------------|----------|-----------------|---------|-----------------|---------|-----------------|---------|
| MNI                      |          | Coefficien<br>t | p-value | Coefficien<br>t | p-value | Coefficien<br>t | p-value |
| Year                     | 2011     | -               |         | -               |         | -               |         |
|                          | 2012     | -0.695          | 0.090   | -0.696          | 0.093   | -0.556          | 0.193   |
|                          | 2013     | -0.347          | 0.195   | -0.352          | 0.183   | -0.502          | 0.030   |
|                          | 2014     | -0.226          | 0.034   | -0.182          | 0.091   | -0.156          | 0.268   |
|                          | 2015     | 0.012           | 0.964   | 0.235           | 0.379   | 0.092           | 0.661   |
| Gender                   | F        | -               |         | -               |         | -               |         |
|                          | M        | -0.168          | 0.067   | -0.159          | 0.081   | -0.144          | 0.124   |
| Smoker                   | No       | -               |         | -               |         | -               |         |
|                          | Yes      | 0.104           | 0.271   | 0.092           | 0.328   | 0.069           | 0.462   |
| Temperature              | <2°      | -               |         | -               |         | -               |         |
|                          | 2°-<10°  | -0.506          | 0.011   | -0.587          | 0.005   | 0.054           | 0.770   |
|                          | 10°-<18° | -0.138          | 0.463   | -0.302          | 0.154   | -0.016          | 0.953   |
|                          | >18°     | -0.069          | 0.761   | -0.089          | 0.748   | 0.214           | 0.521   |
| Factor 1 - PM            |          | -0.579          | 0.082   | -0.559          | 0.187   | -0.483          | 0.422   |
| NBUDs                    |          |                 |         |                 |         |                 |         |
| Year                     | 2011     | -               |         | -               |         | -               |         |
|                          | 2012     | -1.208          | 0.095   | -1.213          | 0.094   | -1.162          | 0.108   |
|                          | 2013     | -0.813          | 0.032   | -0.814          | 0.032   | -0.284          | 0.252   |
|                          | 2014     | -0.408          | 0.003   | -0.408          | 0.003   | -0.358          | 0.010   |
|                          | 2015     | -0.371          | 0.274   | -0.402          | 0.233   | -0.029          | 0.888   |
| Alcohol consumption      | No       | -               |         | -               |         | -               |         |
|                          | Yes      | 0.197           | 0.084   | 0.198           | 0.085   | 0.170           | 0.127   |
| Factor 1 - PM            |          | -0.185          | 0.539   | -0.020          | 0.952   | 0.500           | 0.106   |
| NPBs                     |          |                 |         |                 |         |                 |         |
| Year                     | 2011     | -               |         | -               |         | -               |         |
|                          | 2012     | -0.093          | 0.883   | -0.160          | 0.802   | -0.001          | 0.999   |
|                          | 2013     | -0.894          | 0.147   | -1.010          | 0.091   | -0.604          | 0.188   |
|                          | 2014     | -1.505          | 0.000   | -1.380          | 0.000   | -1.408          | 0.000   |
|                          | 2015     | -0.921          | 0.218   | -0.691          | 0.354   | 0.065           | 0.874   |
| Gender                   | F        | -               |         | -               |         | -               |         |
|                          | M        | 0.402           | 0.025   | 0.348           | 0.052   | 0.347           | 0.050   |
| History of family cancer | No       | -               |         | -               |         | -               |         |

|               |          |        |       |        |       |        |       |
|---------------|----------|--------|-------|--------|-------|--------|-------|
|               | Yes      | 0.498  | 0.014 | 0.519  | 0.005 | 0.373  | 0.042 |
| Temperature   | <2°      | -      |       | -      |       | -      |       |
|               | 2°-<10°  | -0.803 | 0.065 | -0.757 | 0.063 | 0.176  | 0.635 |
|               | 10°-<18° | 0.135  | 0.747 | -0.283 | 0.511 | 0.686  | 0.221 |
|               | >18°     | 0.347  | 0.485 | 0.113  | 0.833 | 0.923  | 0.163 |
|               |          |        |       |        |       |        |       |
| Factor 1 - PM |          | -0.618 | 0.374 | -1.244 | 0.117 | -0.403 | 0.743 |
| NDI           |          |        |       |        |       |        |       |
|               | 2011     | -      |       | -      |       | -      |       |
|               | 2012     | 0.068  | 0.378 | 0.079  | 0.314 | 0.092  | 0.250 |
|               | 2013     | 0.148  | 0.006 | 0.157  | 0.004 | 0.105  | 0.019 |
|               | 2014     | 0.045  | 0.089 | 0.052  | 0.052 | 0.057  | 0.042 |
|               | 2015     | 0.013  | 0.822 | 0.036  | 0.520 | 0.002  | 0.955 |
| Factor 1 - PM |          | 0.190  | 0.002 | 0.170  | 0.012 | 0.136  | 0.039 |

**Table S2.** Model selected for the frequency of micronuclei (MNi), nucleoplasmic bridges (NPBs), nuclear buds (NBUDs) and nuclear division index (NDI) with the confounders and B[a]P for 3, 7, and 30 days.

|               | 1        | 3 days      |         | 7 days      |         | 30 days     |         |
|---------------|----------|-------------|---------|-------------|---------|-------------|---------|
|               |          | Coefficient |         | Coefficient |         | Coefficient |         |
|               |          | t           | p-value | t           | p-value | t           | p-value |
| MNi           | Year     |             |         |             |         |             |         |
|               | 2011     | -           |         | -           |         | -           |         |
|               | 2012     | -0.564      | 0.161   | -0.565      | 0.160   | -0.394      | 0.345   |
|               | 2013     | -0.359      | 0.092   | -0.342      | 0.109   | -0.417      | 0.059   |
|               | 2014     | -0.132      | 0.238   | -0.121      | 0.263   | -0.015      | 0.919   |
|               | 2015     | 0.454       | 0.021   | 0.538       | 0.014   | 0.371       | 0.108   |
| Gender        | F        | -           |         | -           |         | -           |         |
|               | M        | -0.169      | 0.062   | -0.161      | 0.075   | -0.159      | 0.087   |
| Smoker        | No       | -           |         | -           |         | -           |         |
|               | Yes      | 0.096       | 0.285   | 0.089       | 0.320   | 0.070       | 0.451   |
| Temperature   | <2°      | -           |         | -           |         | -           |         |
|               | 2°-<10°  | -0.315      | 0.046   | -0.477      | 0.007   | -0.045      | 0.804   |
|               | 10°-<18° | -0.142      | 0.449   | -0.238      | 0.279   | -0.268      | 0.326   |
|               | >18°     | -0.210      | 0.449   | -0.097      | 0.814   | -0.222      | 0.553   |
|               |          |             |         |             |         |             |         |
| log10 - B[a]P |          | -0.334      | 0.044   | -0.212      | 0.423   | -0.470      | 0.046   |
| NBUDs         |          |             |         |             |         |             |         |
| Year          | 2011     | -           |         | -           |         | -           |         |
|               | 2012     | -1.244      | 0.087   | -1.256      | 0.084   | -1.262      | 0.082   |
|               | 2013     | -0.308      | 0.228   | -0.315      | 0.219   | -0.328      | 0.197   |
|               | 2014     | -0.418      | 0.003   | -0.421      | 0.003   | -0.426      | 0.002   |

|                          |          |        |       |        |       |        |       |
|--------------------------|----------|--------|-------|--------|-------|--------|-------|
|                          | 2015     | -0.101 | 0.669 | -0.105 | 0.656 | -0.126 | 0.579 |
| Alcohol consumption      | No       | -      |       | -      |       | -      |       |
|                          | Yes      | 0.189  | 0.092 | 0.188  | 0.094 | 0.179  | 0.109 |
| log10 - B[a]P            |          | 0.085  | 0.438 | 0.095  | 0.409 | 0.136  | 0.236 |
| NPBs                     |          |        |       |        |       |        |       |
| Year                     | 2011     | -      |       | -      |       | -      |       |
|                          | 2012     | 0.117  | 0.847 | 0.148  | 0.811 | 0.093  | 0.882 |
|                          | 2013     | -0.377 | 0.382 | -0.394 | 0.375 | -0.557 | 0.206 |
|                          | 2014     | -1.291 | 0.000 | -1.167 | 0.000 | -1.335 | 0.000 |
|                          | 2015     | 0.676  | 0.088 | 0.814  | 0.070 | 0.223  | 0.638 |
| Gender                   | F        | -      |       | -      |       | -      |       |
|                          | M        | 0.317  | 0.065 | 0.301  | 0.099 | 0.336  | 0.060 |
| History of family cancer | No       | -      |       | -      |       | -      |       |
|                          | Yes      | 0.504  | 0.005 | 0.445  | 0.019 | 0.394  | 0.035 |
| Temperature              | <2°      | -      |       | -      |       | -      |       |
|                          | 2°-<10°  | -0.455 | 0.162 | -0.664 | 0.074 | 0.141  | 0.702 |
|                          | 10°-<18° | -0.050 | 0.897 | -0.555 | 0.218 | 0.603  | 0.272 |
|                          | >18°     | -0.272 | 0.626 | -0.799 | 0.335 | 0.752  | 0.320 |
| log10 - B[a]P            |          | -0.806 | 0.016 | -1.038 | 0.045 | -0.261 | 0.601 |
| NDI                      |          |        |       |        |       |        |       |
|                          | 2011     | -      |       | -      |       | -      |       |
|                          | 2012     | 0.054  | 0.494 | 0.050  | 0.530 | 0.061  | 0.447 |
|                          | 2013     | 0.083  | 0.062 | 0.082  | 0.068 | 0.088  | 0.053 |
|                          | 2014     | 0.035  | 0.196 | 0.034  | 0.212 | 0.036  | 0.199 |
|                          | 2015     | -0.051 | 0.293 | -0.045 | 0.357 | -0.034 | 0.485 |
| log10 - B[a]P            |          | 0.057  | 0.007 | 0.055  | 0.016 | 0.050  | 0.036 |

**Table S3.** Method limits of detection for measured chemical species in PM<sub>10</sub> samples.

| Analyte                  | PM <sub>10</sub> | PM <sub>2.5</sub> | PM <sub>1</sub> | OC    | EC   | SO <sub>4</sub> <sup>2-</sup> | NO <sub>3</sub> <sup>-</sup> | Cl <sup>-</sup> |       |
|--------------------------|------------------|-------------------|-----------------|-------|------|-------------------------------|------------------------------|-----------------|-------|
| LOD (µg/m <sup>3</sup> ) | 3                | 2                 | 2               | 0.18  | 0.01 | 0.20                          | 0.06                         | 0.05            |       |
| Analyte                  | Pb               | Mn                | Cd              | As    | Ni   | Cu                            | Fe                           | Zn              | B[a]P |
| LOD (ng/m <sup>3</sup> ) | 0.05             | 0.05              | 0.001           | 0.004 | 0.18 | 0.15                          | 1.6                          | 1.1             | 0.035 |

LOD, Limit of detection
